# Supplementary material
Source: Springer Nature journal article supplement (https://www.springermedizin.de/resource/supplementary/13012_2010_345_MOESM3_ESM.pdf/9629822)

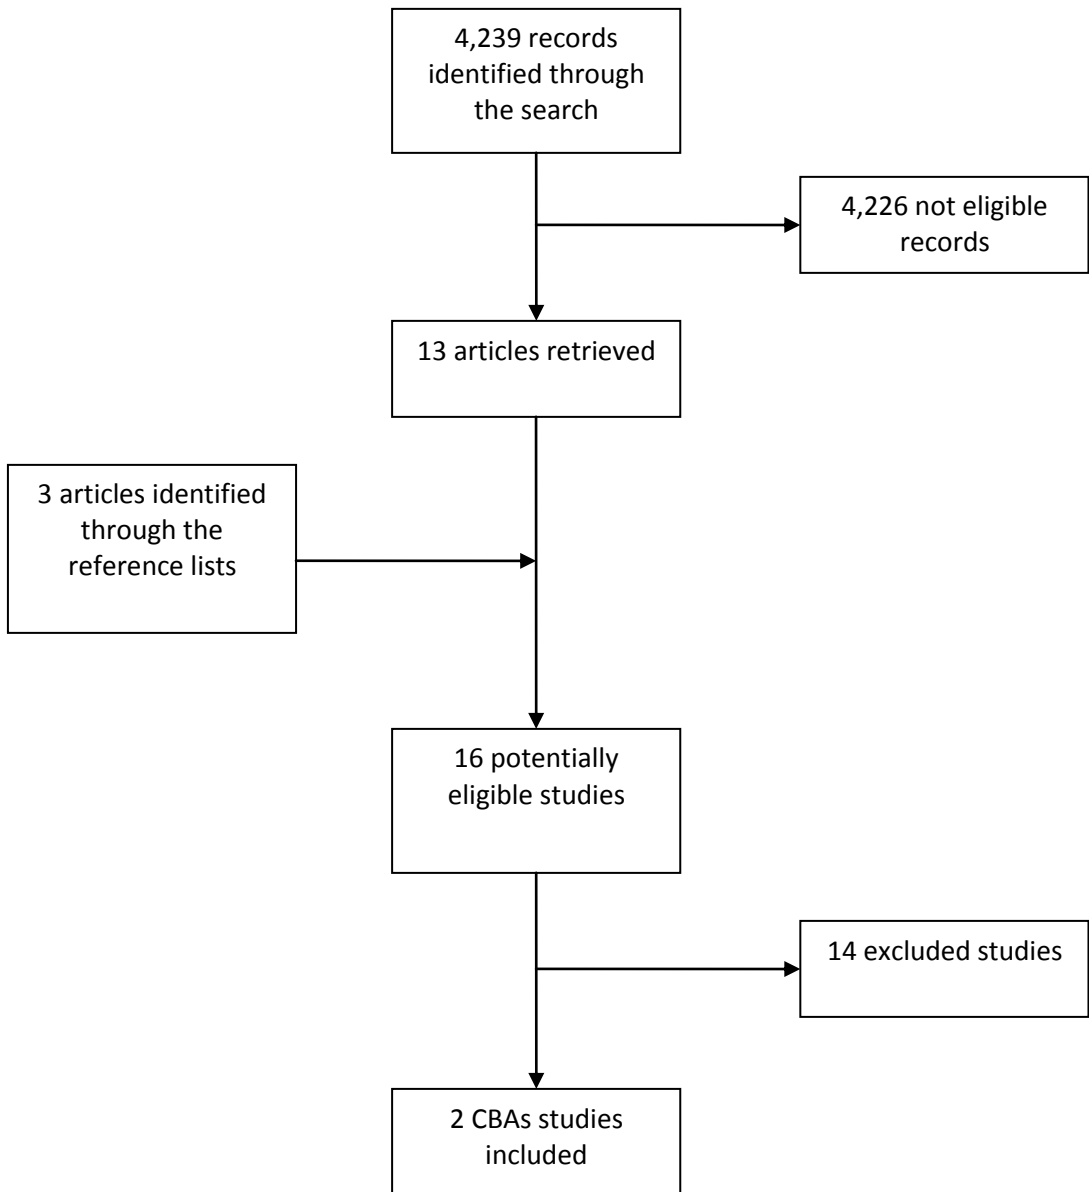

Supplement: MOESM3 [file 9629822]
